# Supplementary material for: TCR-engineered adoptive cell therapy effectively treats intracranial murine glioblastoma
Source: PubMed Central journal article supplement — J Immunother Cancer. 2023 Feb 20;11(2):e006121. doi: 10.1136/jitc-2022-006121 (PMC9944319; doi:10.1136/jitc-2022-006121), 2023-02-20
Supplement: jitc-2022-006121supp001.pdf [file jitc-2022-006121supp001.pdf]

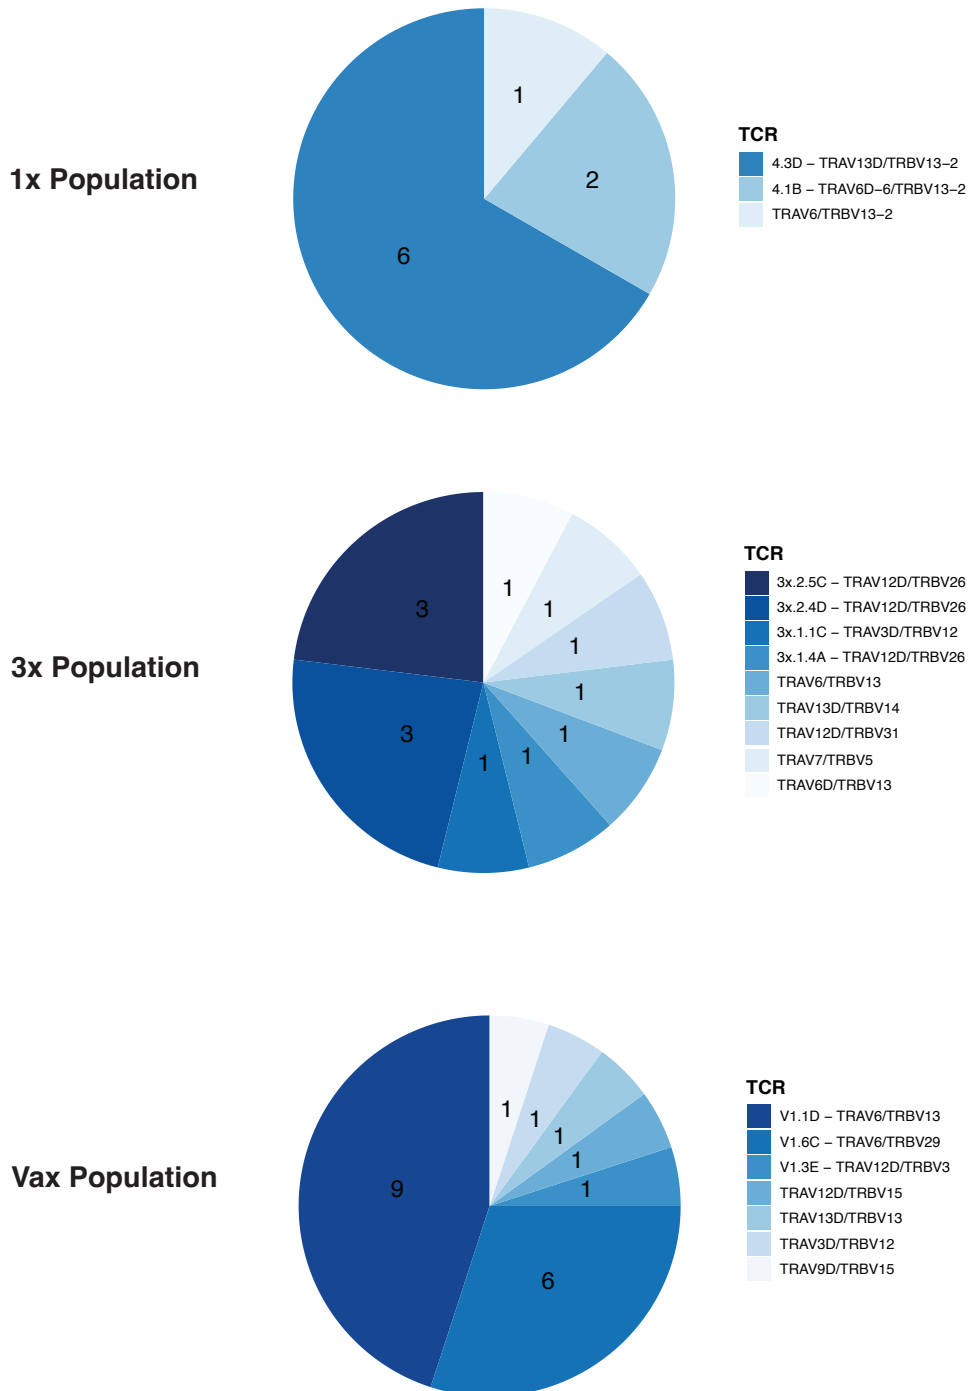

**Supplemental Figure S1: Clonotype distributions of expanded populations.** Pie charts depicting the frequency of each clonotype identified via single-cell PCR in either 1x stimulated splenocytes (top), 3x stimulated splenocytes (middle), or vaccine stimulated splenocytes (bottom). TCRs later screened for functional status are labeled with their specific name.

| <b>TCR</b>    | <b>Alpha Chain</b> | <b>Alpha CDR3</b> | <b>Beta Chain</b>  | <b>Beta CDR3</b>   |
|---------------|--------------------|-------------------|--------------------|--------------------|
| <b>4.1B</b>   | TRAV6D/TRAJ47      | CALGAEDYANKMIF    | TRBV13/TRBJ2/TRBD1 | CASGDWVGAETLYF     |
| <b>4.3D</b>   | TRAV13D/TRAJ26     | CALEYAQGLTF       | TRBV13/TRBJ2/TRBD2 | CASGGLGDQDTQYF     |
| <b>V1.1D</b>  | TRAV6/TRAJ22       | CVLGDSGSWQLIF     | TRBV13/TRBJ2/TRBD2 | CASGDAMGGAETLYF    |
| <b>V1.6C</b>  | TRAV6/TRAJ22       | CVLAHASSGSWQLIF   | TRBV29/TRBJ2/TRBD2 | CASPTGGLAKTLYF     |
| <b>V1.3E</b>  | TRAV12D/TRAJ18     | CALSDRGSALGRLHF   | TRBV3/TRBJ2/TRBD1  | CASSLEQGGGYNIAEQFF |
| <b>3x1.1C</b> | TRAV3D/TRAJ17      | CAVGGSNSAGNKLTF   | TRBV12/TRBJ1/TRBD1 | CASSLEDREGSDYTF    |
| <b>3x1.4A</b> | TRAV12D/TRAJ6      | CALVPGGNYKPTF     | TRBV26/TRBJ2/TRBD1 | CASSPDSYEQYF       |
| <b>3x2.4D</b> | TRAV12D/TRAJ6      | CALIPGGNYKPTF     | TRBV26/TRBJ2/TRBD1 | CASSPDSYEQYF       |
| <b>3x2.5C</b> | TRAV12D/TRAJ6      | CALSEGNYKPTF      | TRBV26/TRBJ2/TRBD1 | CASSPDSYEQYF       |

**Supplemental Figure S2: Candidate neoantigen-specific TCRs.** List of 9 candidate TCRs identified from single-cell PCR that were selected for further analysis with their indicated TCR characteristics.

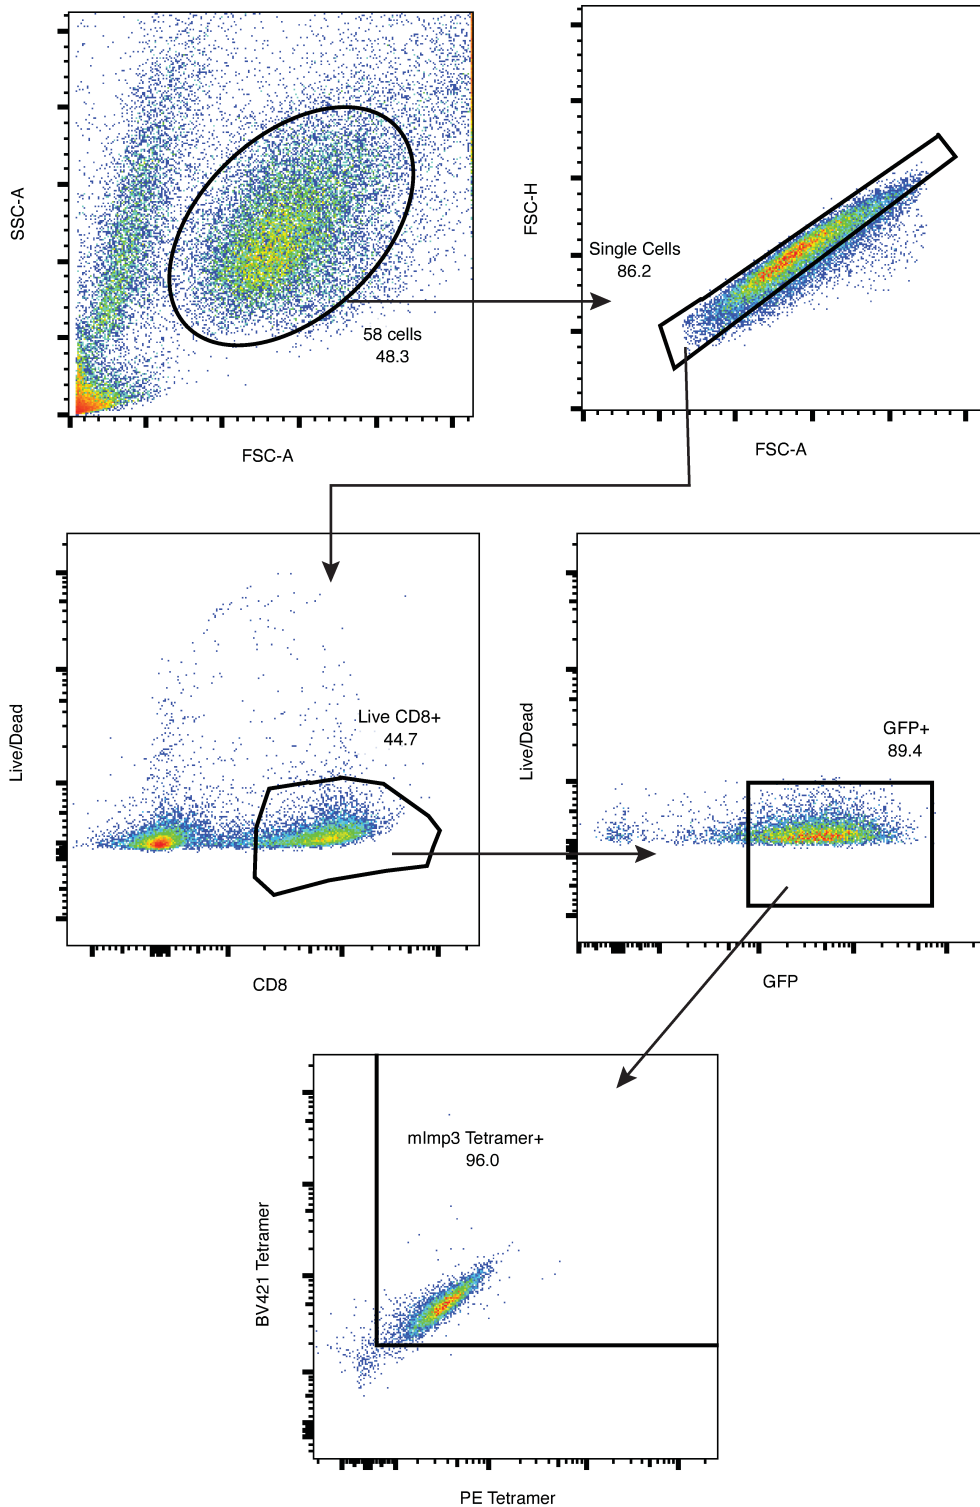

**Supplemental Figure S3: Gating schema for 58 hybridoma cells.** Example gating schema for 58 hybridoma cells transduced with candidate TCR (3x1.1C) and stained with cell-surface antibodies and fluorescently conjugated mImp3 tetramer.

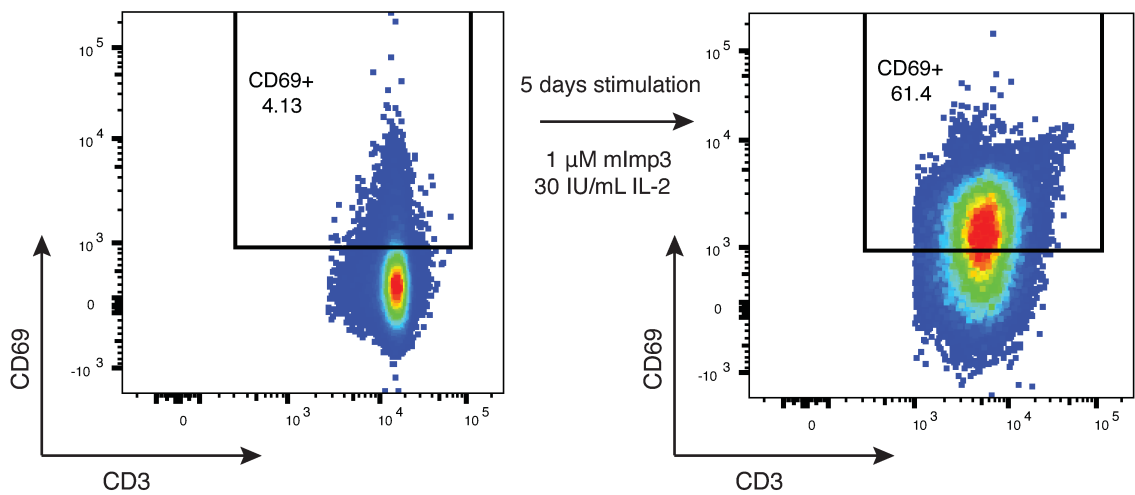

**Supplemental Figure S4: MISTIC splenocyte peptide-specific activation.** Representative flow cytometry plots of naive (left) or peptide-stimulated (right) CD8 T cells from the spleens of MISTIC transgenic mice after 5 days of in-vitro stimulation with mImp3 peptide and IL-2.

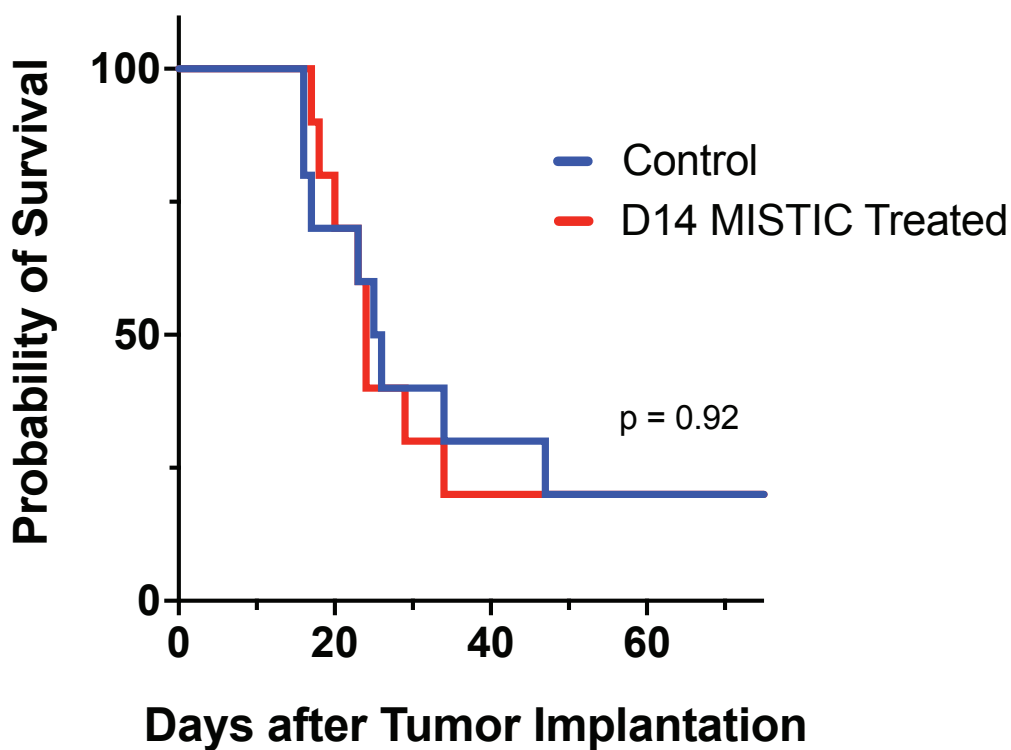

**Supplemental Figure S5: Efficacy of delayed MISTIC adoptive cell therapy.** Survival of GL261-bearing mice treated on day 14 with either irradiation and IL-2 (Control) or irradiation, IL-2, and MISTIC T cells (MISTIC Treated). N=10 for each group from 2 independent experiments. Significance assessed by log-rank test.

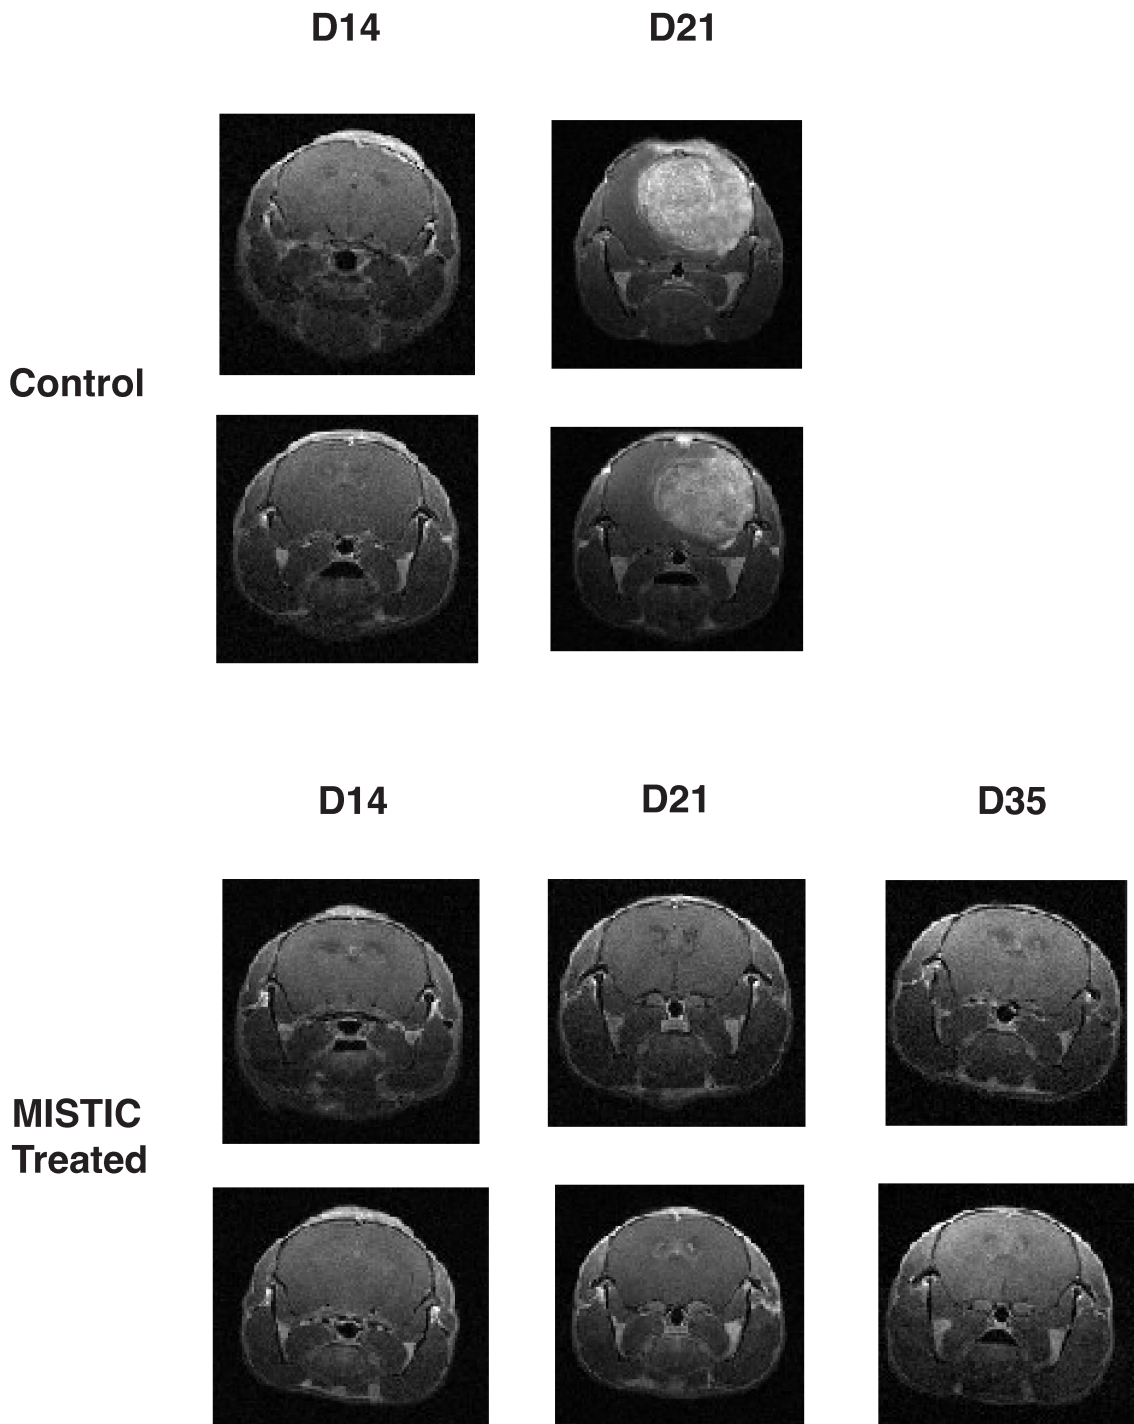

**Supplemental Figure S6: Serial MRI of tumor-bearing mice.** Representative T1-weighted MRI scans of either control or day 7 MISTIC treated mice 14, 21, or 35 days following tumor implantation.

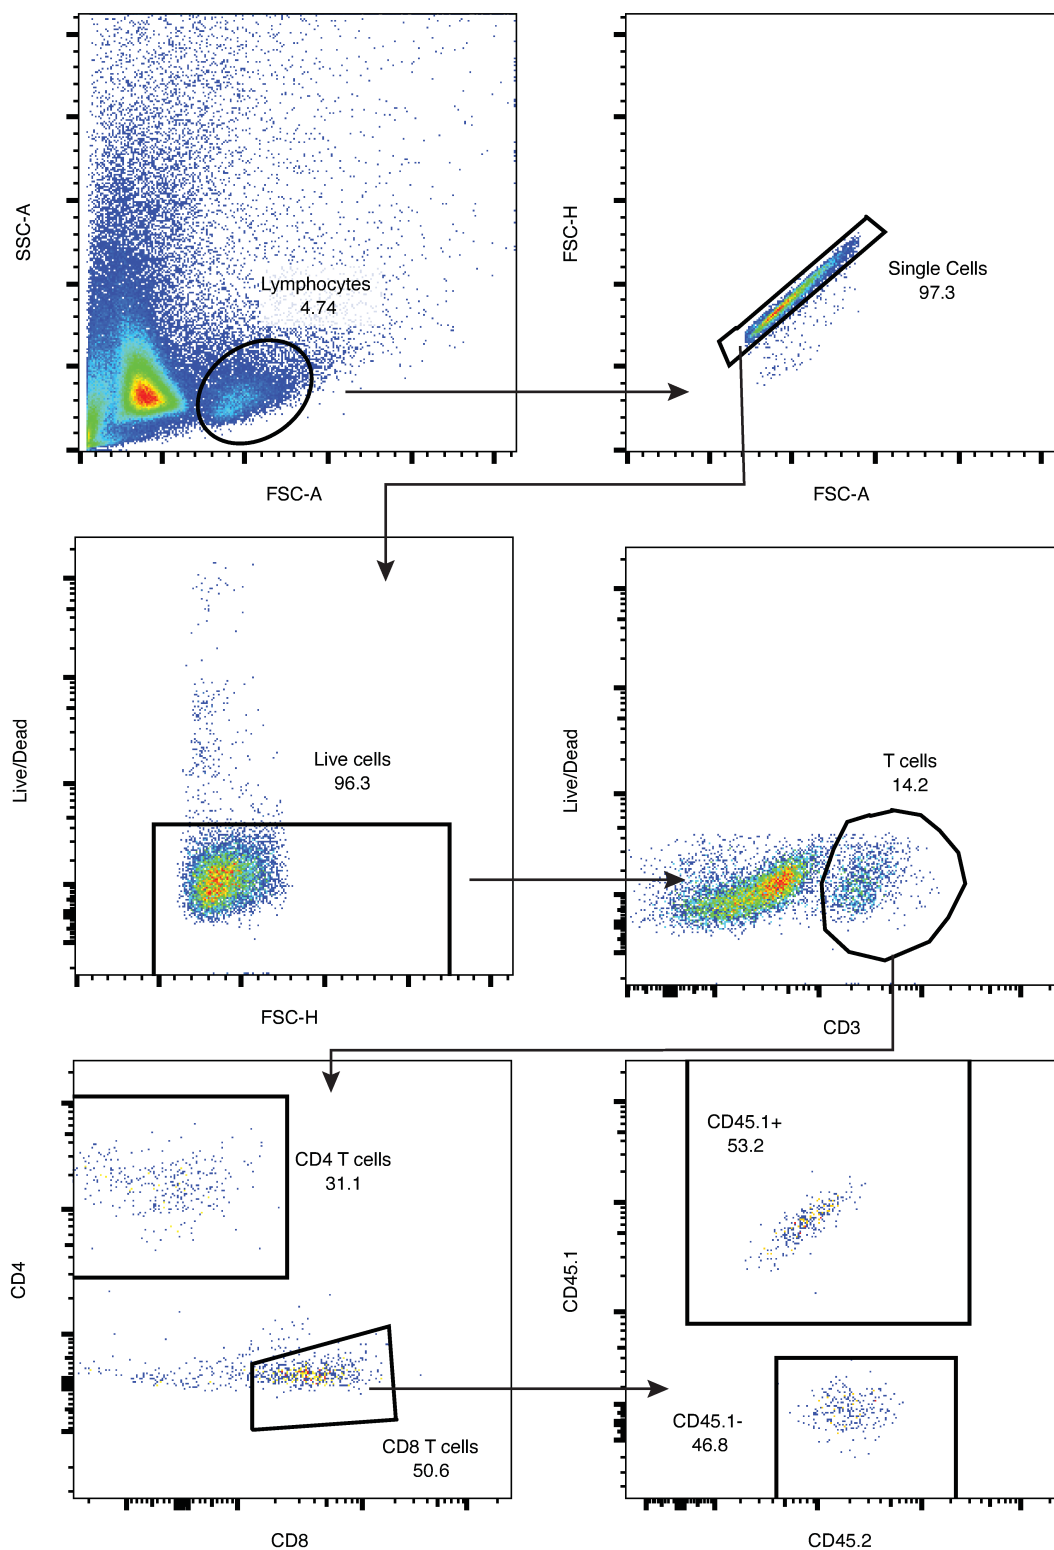

**Supplemental Figure S7: Gating schema for adoptively transferred MISTIC T cells.** Example gating schema for the identification of congenically labeled adoptively transferred MISTIC T cells. The provided example is from tumor tissue.

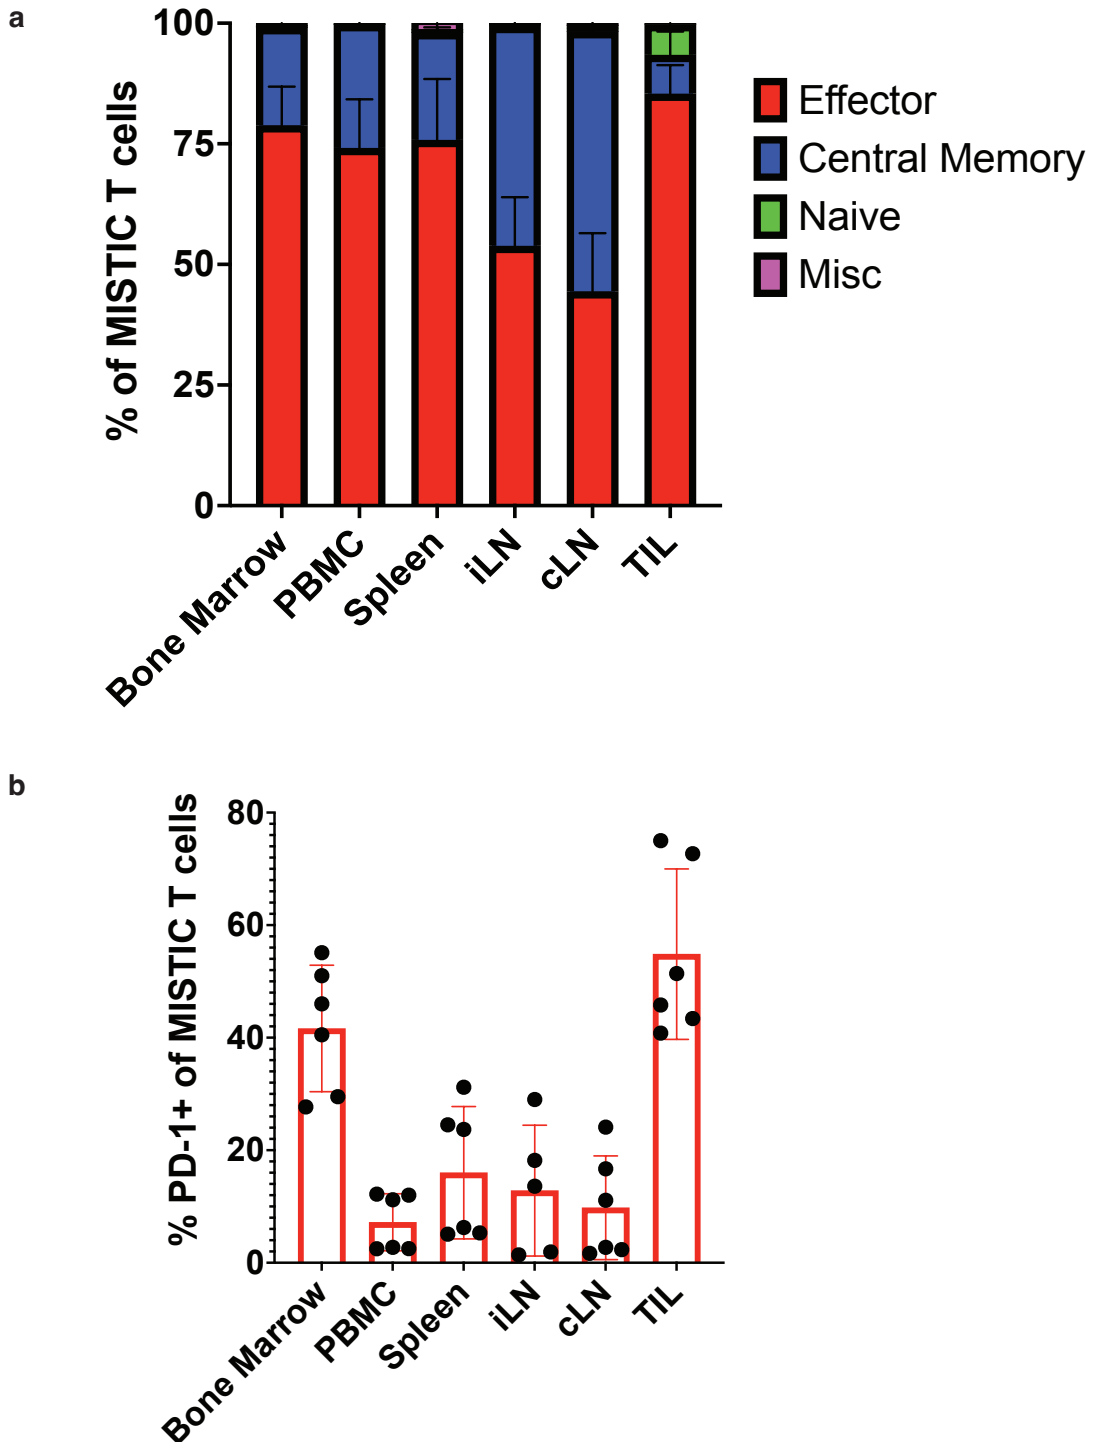

**Supplemental Figure S8: Phenotypic characteristics of adoptively transferred MISTIC T cells.**

**a**, Stacked bar plots displaying the proportion of MISTIC T cells of a given phenotypic state in each anatomical compartment on day 10 (3 days post-transfer). Phenotypic states defined as follows: effector (CD44+ CD62L<sup>-</sup>), central memory (CD44+ CD62L<sup>+</sup>), or naive (CD44<sup>-</sup> CD62L<sup>+</sup>). N=6 from 2 independent experiments. **b**, Proportion of PD-1+ MISTIC T cells in each anatomical compartment on day 10 (3 days post-transfer). N=6 from 2 independent experiments.



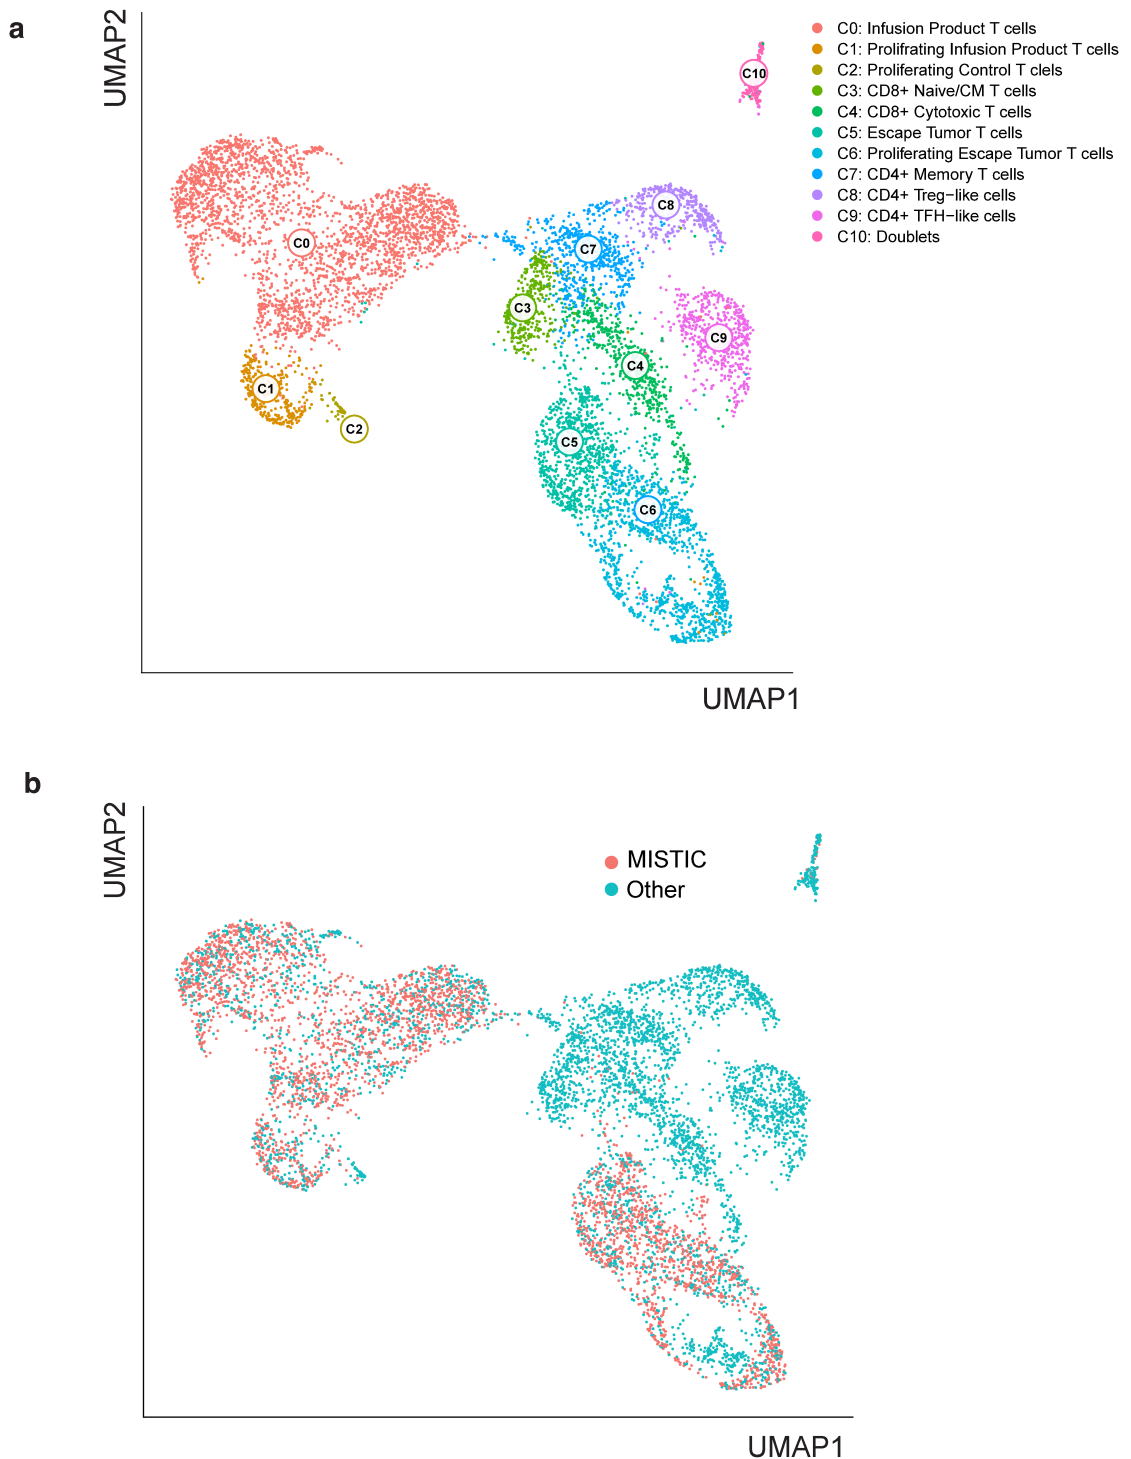

**Supplemental Figure S9: Characterization of single-cell populations. a**, UMAP representation dimensionality reduction of the scRNA-seq data with cell types labeled according to canonical marker genes. **b**, UMAP representation dimensionality reduction of the scRNA-seq data derived from the three populations with cells bearing the 3x1.1C TCR labeled as “MISTIC”.

## CD8

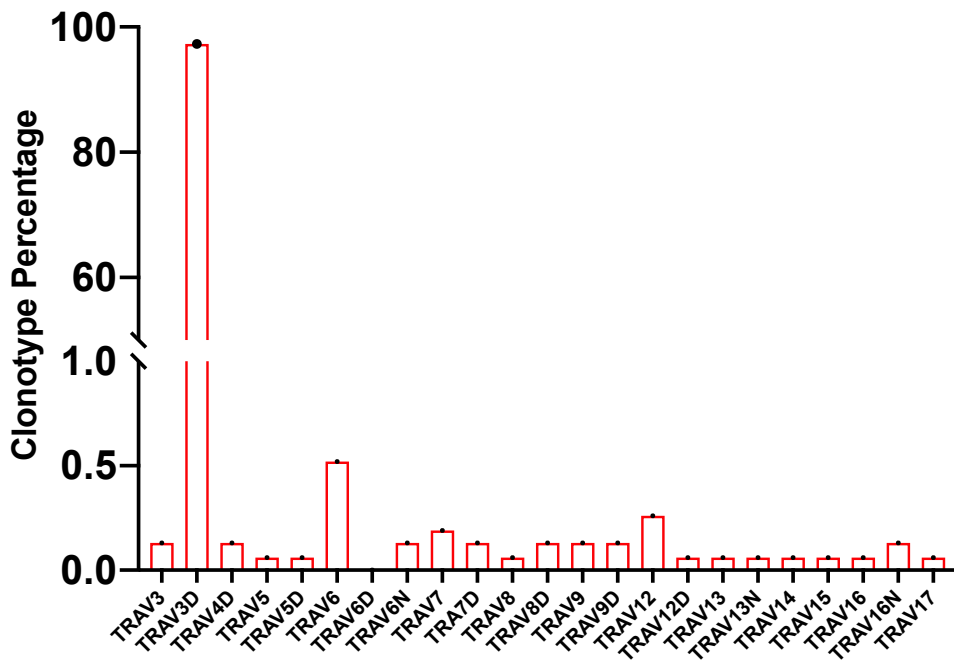

## CD4

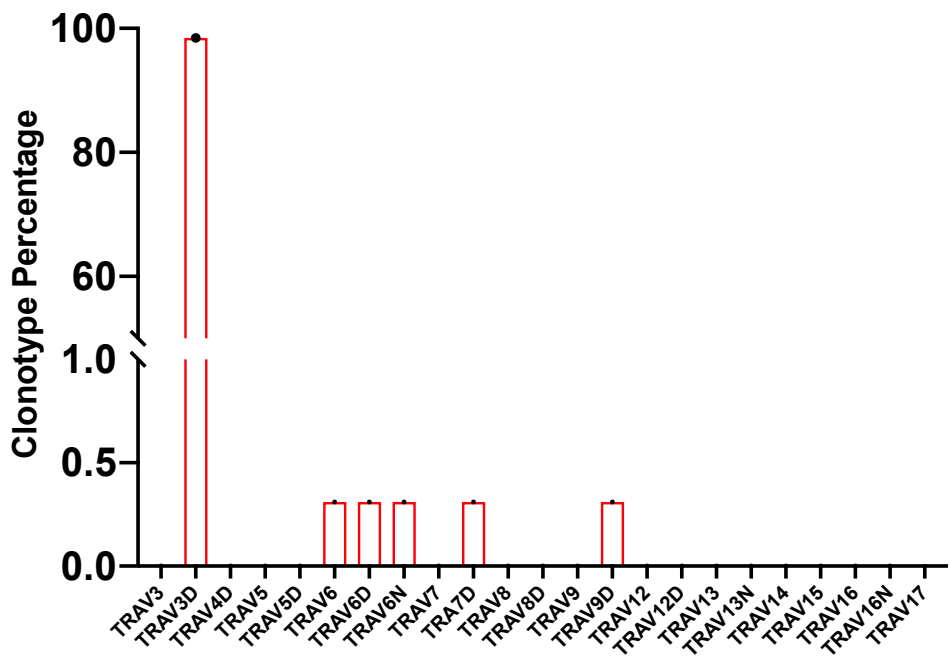

**Supplemental Figure S10: Clonal architecture of MISTIC infusion product.** TCR  $\alpha$  chain usage from 1,543 CD8+ and 324 CD4+ T cells within the MISTIC infusion product as assessed via single-cell RNA-sequencing. TCR  $\alpha$  chains not represented among either the CD8 or CD4 populations were omitted for clarity.

a

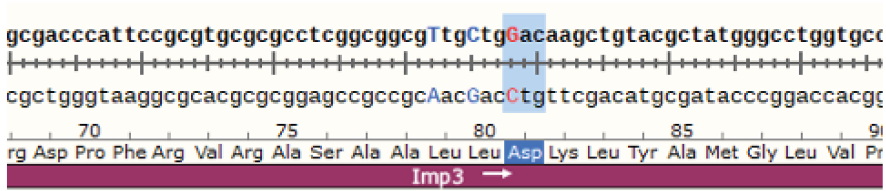

b

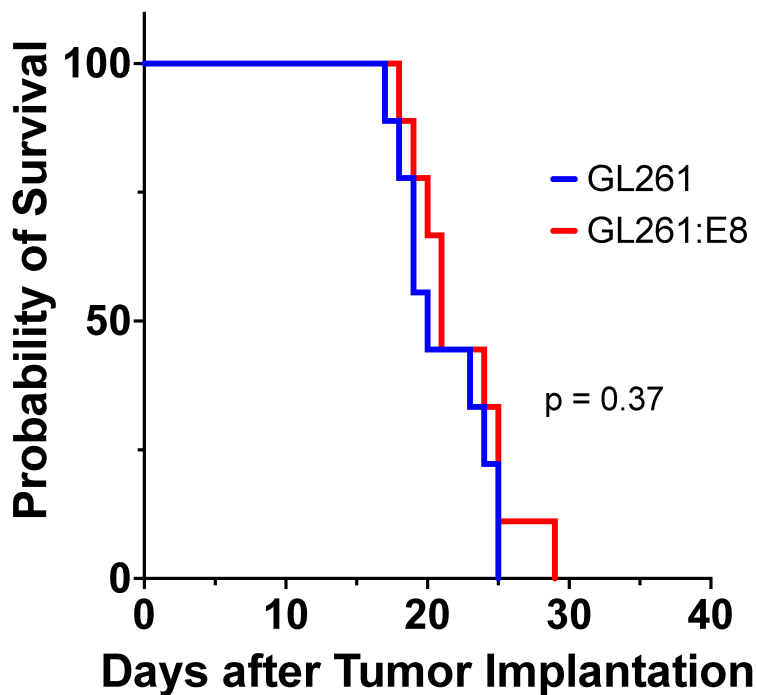

**Supplemental Figure S11: Generation and characterization of GL261:E8 cell line. a,** Sequencing results from the Imp3 locus in GL261:E8 confirming the N81D conversion to the wild-type Imp3 sequence. **b,** Survival of tumor-bearing mice following intracranial implantation with either GL261 or GL261:E8. N=10 mice in each group from 2 independent experiments. Significance by log-rank test.

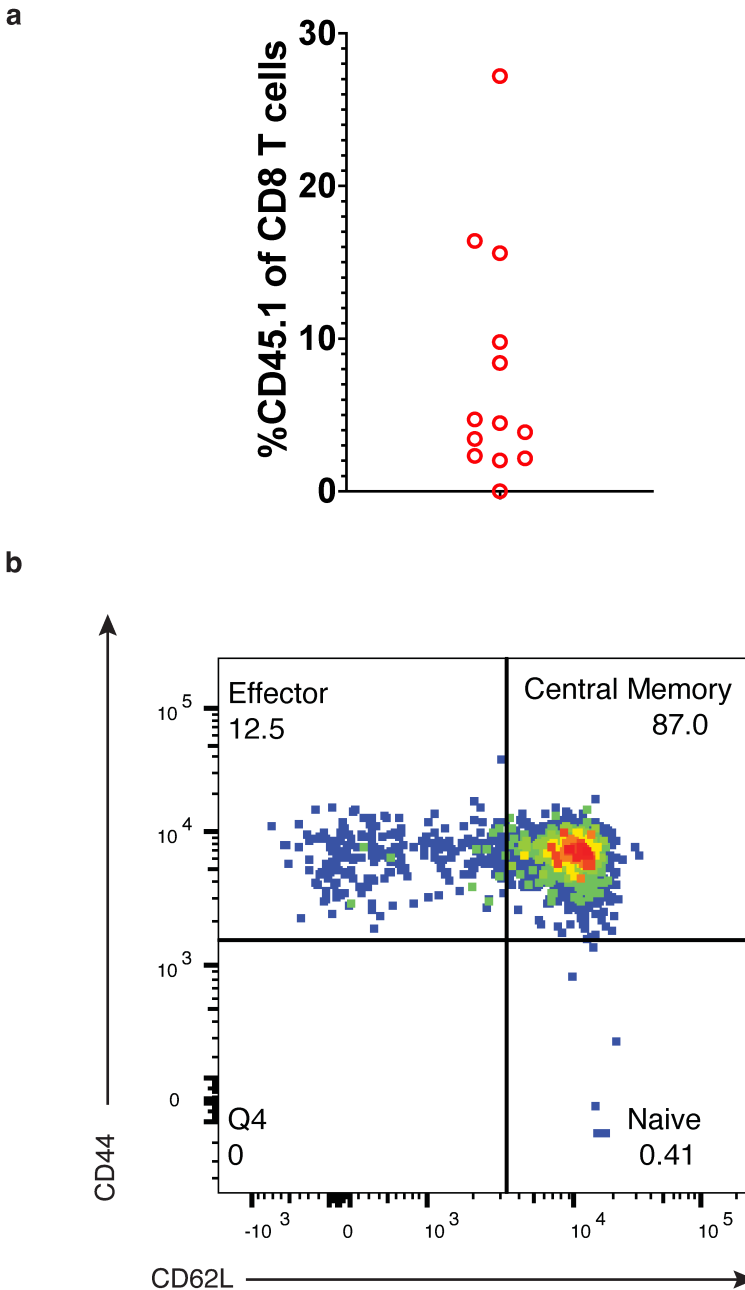

**Supplemental Figure S12: Persistence of MISTIC T cells following transfer.** **a**, Frequency of MISTIC T cells among CD8 T cells in peripheral blood of treated mice on day 50 following tumor implantation. N=13 mice from 3 separate experimental replicates. **b**, Representative flow cytometry plot displaying expression of CD44 and CD62L in MISTIC T cells in the peripheral blood of treated mice on day 50 following tumor implantation. N=13 mice from 3 separate experimental replicates.
